# Supplementary material for: Replication of linkage at chromosome 20p13 and identification of suggestive sex-differential risk loci for autism spectrum disorder
Source: PubMed Central journal article supplement (PMC3942516; doi:10.1186/2040-2392-5-13), 2014-02-17

### A Chromosome 6

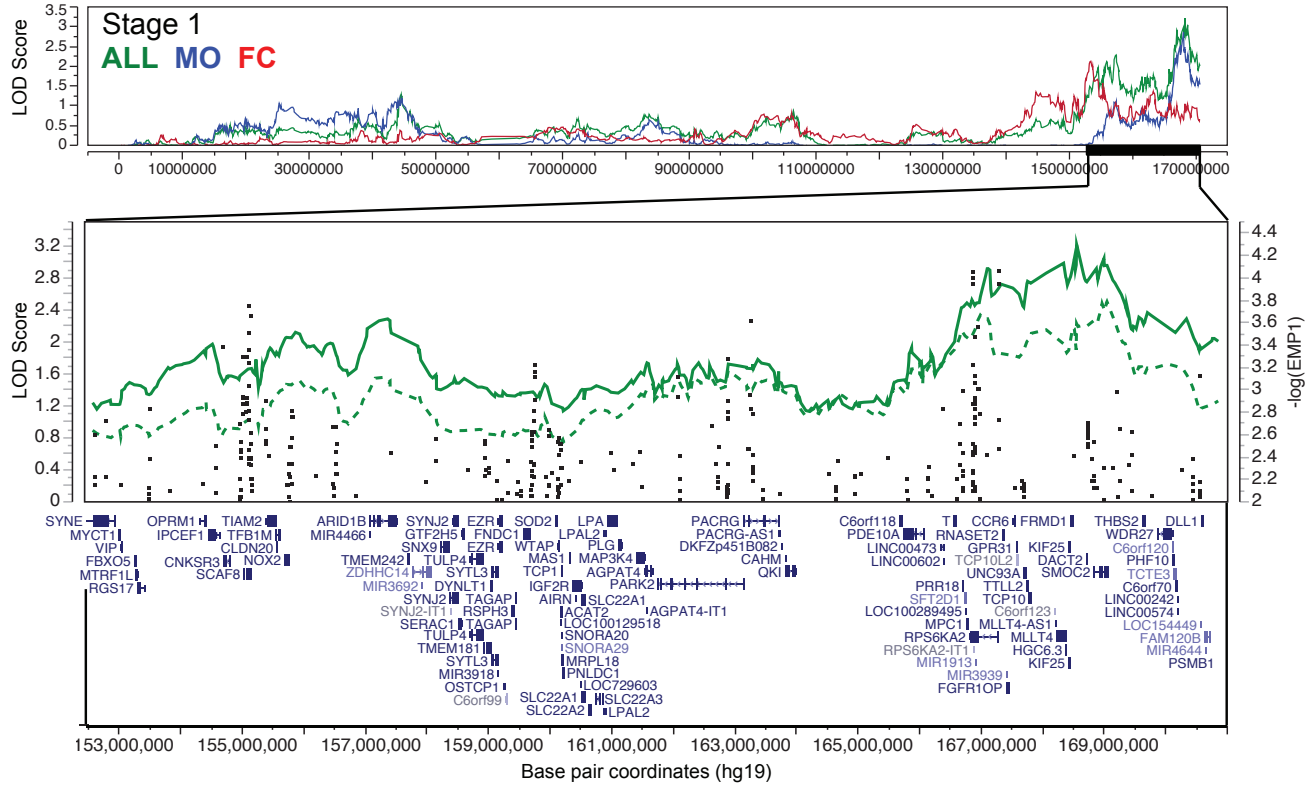

### B Chromosome 8

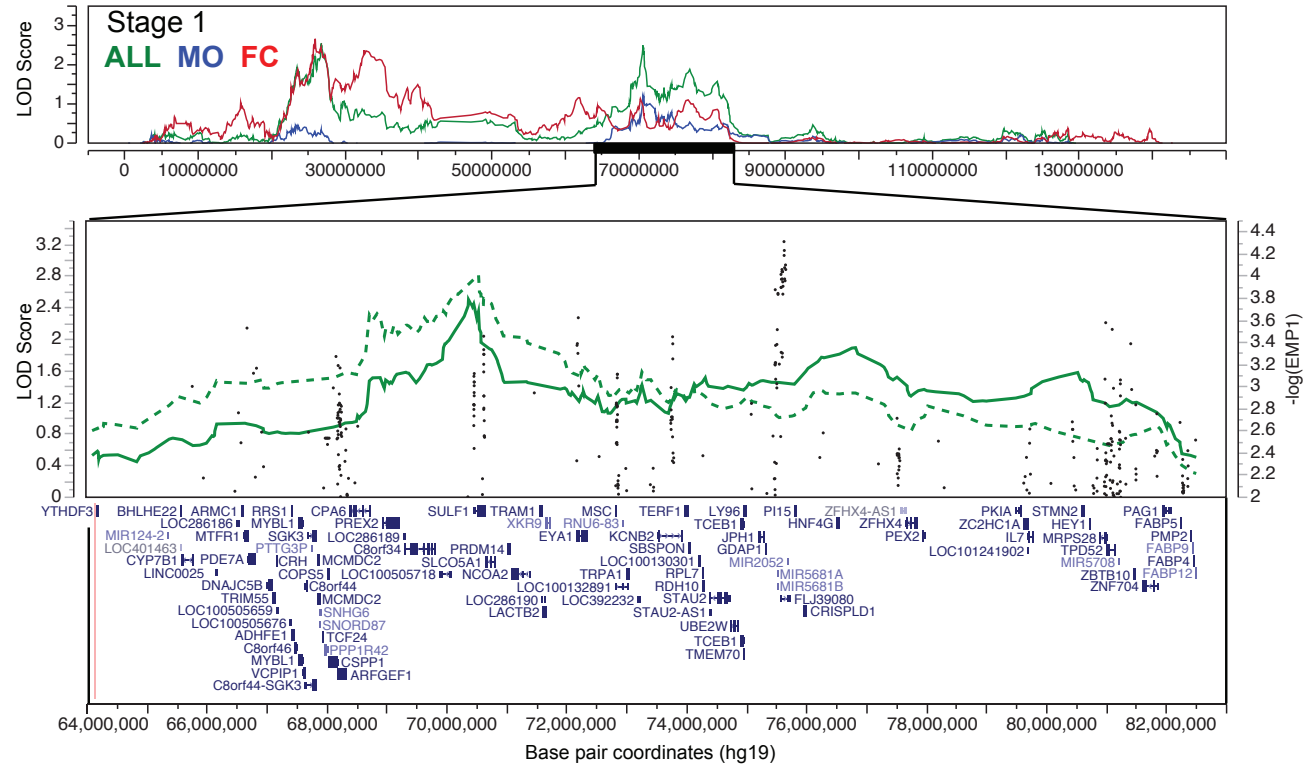

Supplement: 2040-2392-5-13-S2.pdf [file 2040-2392-5-13-S2.pdf]
